# Supplementary material
Source: publisher site journal article supplement (https://www.dovepress.com/get_supplementary_file.php?f=162470a.xlsx)
Supplement: Supplementary file 1 [file get_supplementary_file.php]

## Sheet: Sheet1
Accession Number	Description	Symbol	Coverage(%)	Match Peptides	H/L Ratio	PC-1.0/PC-1Ratio	Significance	Mascot Scores
P30101	Protein disulfide-isomerase A3	PDIA3	14.9	8	0.02	-4.13392	0.00152872	118.18
P27797	Calreticulin	CALR	4.39	4	0.031	-5.12697	8.4876e-05	89.59
P11047	Laminin subunit gamma-1	LAMC1	30.02	36	0.023	-4.69382	0.000320357	370.64
Q96M96	FYVE, RhoGEF and PH domain-containing protein 4	FGD4	9.14	11	0.078	-4.22071	0.0012135	57.02
P30533	Alpha-2-macroglobulin receptor-associated protein	LRPAP1	1.96	1	0.026	-5.49882	2.49595e-05	31.17
